# Supplementary material for: Ultrathin Co-O oxide layer-driven perpendicular magnetic anisotropy in a CoO/[Co/Pd]m multilayer matrix upon annealing
Source: PubMed Central journal article supplement (PMC5122862; doi:10.1038/srep37503), 2016-11-25
Supplement: srep37503-s1.pdf [file srep37503-s1.pdf]

# **Ultrathin Co-O oxide layer-driven perpendicular magnetic anisotropy in a CoO/[Co/Pd]<sub>m</sub> multilayer matrix upon annealing**

*Woo Seong Chung,<sup>1</sup> Seung Mo Yang<sup>2</sup>, Tae Whan Kim,<sup>1</sup> and Jin Pyo Hong<sup>2,\*</sup>*

*<sup>1</sup>Nano Quantum Electronics Lab, Department of Electronics and Computer Engineering, Hanyang University,  
Seoul 133-791, South Korea*

*<sup>2</sup>Novel Functional Materials and Devices Laboratory, Research Institute for Natural Science, Department of  
Physics, Hanyang University, Seoul 133-791, South Korea*

## **Supplementary Information**

## 1. Magnetic hysteresis loops of the as-grown and annealed Co capping without oxygen insertion (Stack A)

As shown in Fig. S1, Stack A with a Co capping layer containing no oxygen exhibited no clear PMA regardless of annealing, in which in-plane dominant magnetization was obtained without particular change.

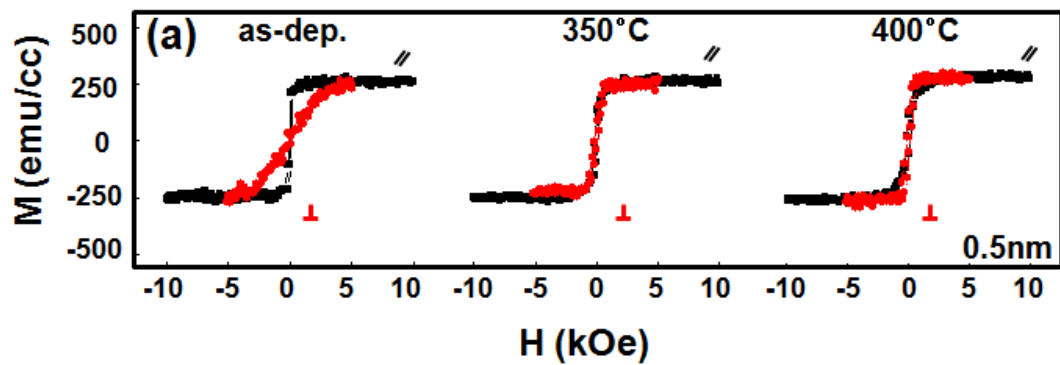

**Fig. S1.** Magnetic hysteresis loops of as-grown, 350°C, and 400°C-annealed Stack A, where the Co capping thickness was  $t_{Co} = 0.5$  nm

## 2. Magnetic hysteresis loops and $K_{eff}$ value of 425°C-annealed Stack B

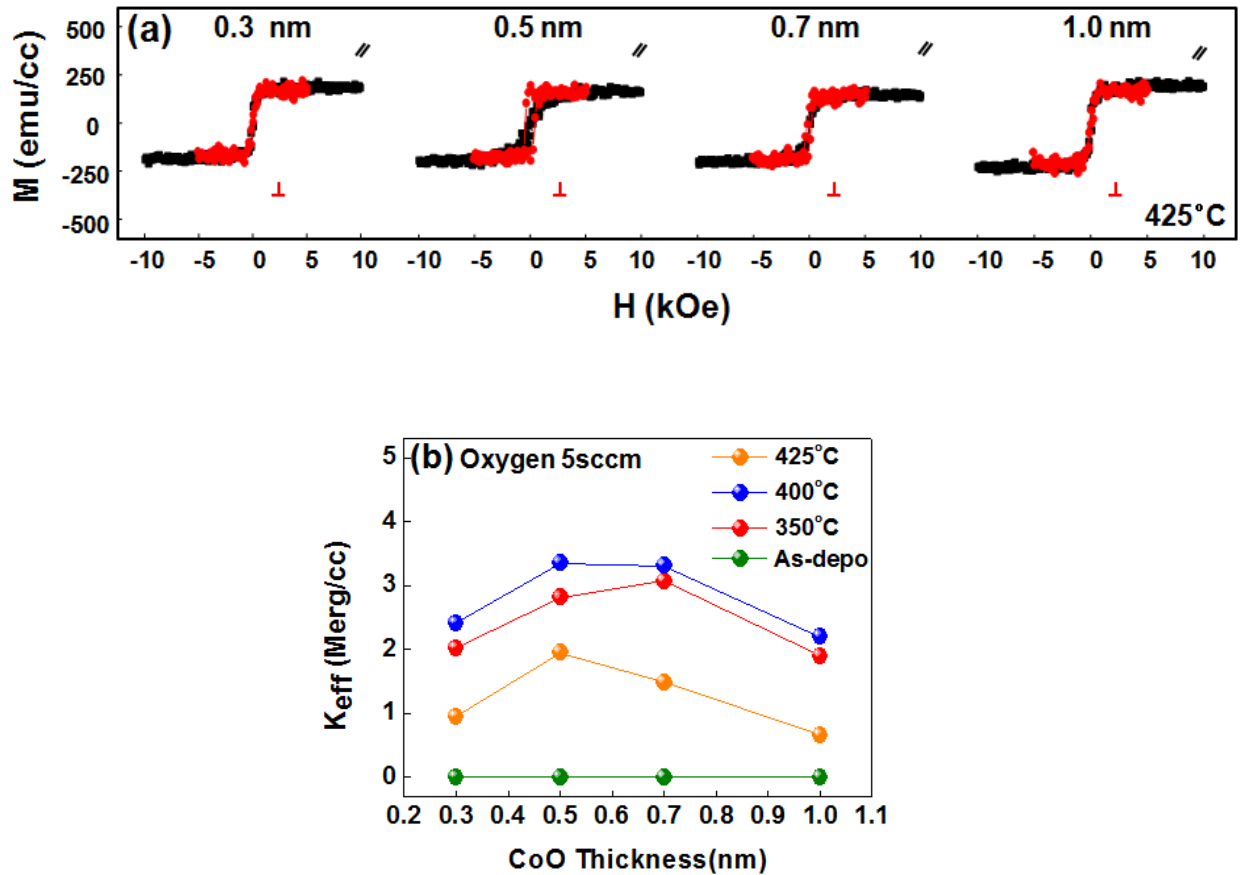

**Fig. S2.** (a) Magnetic hysteresis loops of 425°C-annealed Stack B, where the Co capping thickness was  $t_{CoO} = 0.3 \sim 1.0$  nm, (b) effective magnetic anisotropy energy ( $K_{eff}$ ) for as-grown (green line), 350°C (red line), 400°C (blue line), and 425°C (orange line) post-annealed Stack B samples as a function of CoO thickness.

### 3. TEM images and corresponding EDS analyses of 350°C-annealed Stack B

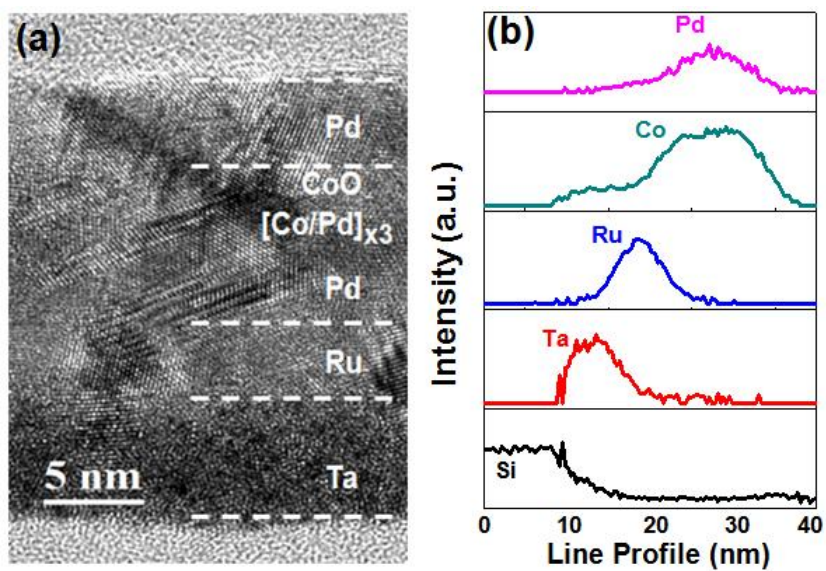

**Fig. S3.** (a) TEM images and (b) corresponding EDS analyses of 350°C-annealed Stack B, in which oxygen was not detected due to the extremely small amount of oxygen inside the CoO capping layer and significant out-diffusion during annealing.
